# Supplementary material for: A comparative approach to elucidate chloroplast genome replication
Source: PubMed Central journal article supplement (PMC2695485; doi:10.1186/1471-2164-10-237), 2009-05-20
Supplement: 1471-2164-10-237-S1.pdf [file 1471-2164-10-237-S1.pdf]

| <b>Sr. No.</b> | <b>Species</b>                                | <b>Abbreviations</b> | <b>Locus IDs</b> |
|----------------|-----------------------------------------------|----------------------|------------------|
| 1              | <i>Acorus americanus</i>                      | <i>Aam</i>           | NC_010093        |
| 2              | <i>Atropa belladonna</i>                      | <i>Abe</i>           | NC_004561        |
| 3              | <i>Acorus calamus</i>                         | <i>Aca</i>           | NC_007407        |
| 4              | <i>Adiantum capillus-veneris</i>              | <i>Acav</i>          | NC_004766        |
| 5              | <i>Aethionema cordifolium</i>                 | <i>Aco</i>           | NC_009265        |
| 6              | <i>Angiopteris evecta</i>                     | <i>Aev</i>           | NC_008829        |
| 7              | <i>Anthoceros formosae</i>                    | <i>Afo</i>           | NC_004543        |
| 8              | <i>Aethionema grandiflorum</i>                | <i>Agr</i>           | NC_009266        |
| 9              | <i>Arabis hirsuta</i>                         | <i>Ahi</i>           | NC_009268        |
| 10             | <i>Aneura mirabilis</i>                       | <i>Ami</i>           | NC_010359        |
| 11             | <i>Agrostis stolonifera</i>                   | <i>Ast</i>           | NC_008591        |
| 12             | <i>Arabidopsis thaliana</i>                   | <i>Ath</i>           | NC_000932        |
| 13             | <i>Amborella trichopoda</i>                   | <i>Atr</i>           | NC_005086        |
| 14             | <i>Brachypodium distachion</i>                | <i>Bdi</i>           | NC_011032        |
| 15             | <i>Buxus microphylla</i>                      | <i>Bmi</i>           | NC_009599        |
| 16             | <i>Barbarea verna</i>                         | <i>Bve</i>           | NC_009269        |
| 17             | <i>Coffea arabica</i>                         | <i>Car</i>           | NC_008535        |
| 18             | <i>Chlorokybus atmophyticus</i>               | <i>Cat</i>           | NC_008822        |
| 19             | <i>Capsella bursa-pastoris</i>                | <i>Cbu</i>           | NC_009270        |
| 20             | <i>Ceratophyllum demersum</i>                 | <i>Cde</i>           | NC_009962        |
| 21             | <i>Cuscuta exaltata</i>                       | <i>Cex</i>           | NC_009963        |
| 22             | <i>Calycanthus fertilis var. ferax</i>        | <i>Cfe</i>           | AJ428413         |
| 23             | <i>Calycanthus floridus var. glaucus</i>      | <i>Cfl</i>           | NC_004993        |
| 24             | <i>Chaetosphaeridium globosum</i>             | <i>Cgl</i>           | NC_004115        |
| 25             | <i>Chlamydomonas reinhardtii</i>              | <i>Chre</i>          | NC_005353        |
| 26             | <i>Chlorella vulgaris</i>                     | <i>Chvu</i>          | NC_001865        |
| 27             | <i>Cryptomeria japonica</i>                   | <i>Cja</i>           | NC_010548        |
| 28             | <i>Carica papaya</i>                          | <i>Cpa</i>           | NC_010323        |
| 29             | <i>Cuscuta reflexa</i>                        | <i>Cre</i>           | NC_009766        |
| 30             | <i>Cucumis sativus</i>                        | <i>Csa</i>           | NC_007144        |
| 31             | <i>Citrus sinensis</i>                        | <i>Csi</i>           | NC_008334        |
| 32             | <i>Chloranthus spicatus</i>                   | <i>Csp</i>           | NC_009598        |
| 33             | <i>Cycas taitungensis</i>                     | <i>Cta</i>           | NC_009618        |
| 34             | <i>Chara vulgaris</i>                         | <i>Cvu</i>           | NC_008097        |
| 35             | <i>Crucihimalaya wallichii</i>                | <i>Cwa</i>           | NC_009271        |
| 36             | <i>Daucus carota</i>                          | <i>Dca</i>           | NC_008325        |
| 37             | <i>Dioscorea elephantipes</i>                 | <i>Del</i>           | NC_009601        |
| 38             | <i>Drimys granadensis</i>                     | <i>Dgr</i>           | NC_008456        |
| 39             | <i>Draba nemorosa</i>                         | <i>Dne</i>           | NC_009272        |
| 40             | <i>Eucalyptus globulus subsp. globulus</i>    | <i>Egl</i>           | NC_008115        |
| 41             | <i>Epifagus virginiana</i>                    | <i>Evi</i>           | NC_001568        |
| 42             | <i>Fagopyrum esculentum subsp. Ancestrale</i> | <i>Fes</i>           | NC_010776        |
| 43             | <i>Guizotia abyssinica</i>                    | <i>Gab</i>           | NC_010601        |
| 44             | <i>Gossypium barbadense</i>                   | <i>Gba</i>           | NC_008641        |

|    |                                                |            |           |
|----|------------------------------------------------|------------|-----------|
| 45 | <i>Gossypium hirsutum</i>                      | <i>Ghi</i> | NC_007944 |
| 46 | <i>Glycine max</i>                             | <i>Gma</i> | NC_007942 |
| 47 | <i>Helianthus annuus</i>                       | <i>Han</i> | NC_007977 |
| 48 | <i>Huperzia lucidula</i>                       | <i>Hlu</i> | NC_006861 |
| 49 | <i>Helicosporidium sp ex Simulium jonesii</i>  | <i>Hsi</i> | NC_008100 |
| 50 | <i>Hordeum vulgare subsp. vulgare</i>          | <i>Hvu</i> | NC_008590 |
| 51 | <i>Illicium oligandrum</i>                     | <i>Iol</i> | NC_009600 |
| 52 | <i>Ipomoea purpurea</i>                        | <i>Ipu</i> | NC_009808 |
| 53 | <i>Jasminum nudiflorum</i>                     | <i>Jnu</i> | NC_008407 |
| 54 | <i>Lycopersicon esculentum cultivar LA3023</i> | <i>Les</i> | DQ347959  |
| 55 | <i>Lotus japonicus</i>                         | <i>Lja</i> | NC_002694 |
| 56 | <i>Lobularia maritima</i>                      | <i>Lma</i> | NC_009274 |
| 57 | <i>Lemna minor</i>                             | <i>Lmi</i> | NC_010109 |
| 58 | <i>Lolium perenne</i>                          | <i>Lpe</i> | NC_009950 |
| 59 | <i>Lactuca sativa</i>                          | <i>Lsa</i> | NC_007578 |
| 60 | <i>Leptosira terrestris</i>                    | <i>Lte</i> | NC_009681 |
| 61 | <i>Liriodendron tulipifera</i>                 | <i>Ltu</i> | NC_008326 |
| 62 | <i>Lepidium virginicum</i>                     | <i>Lvi</i> | NC_009273 |
| 63 | <i>Manihot esculenta</i>                       | <i>Mes</i> | NC_010433 |
| 64 | <i>Morus indica</i>                            | <i>Min</i> | NC_008359 |
| 65 | <i>Marchantia polymorpha</i>                   | <i>Mpo</i> | NC_001319 |
| 66 | <i>Medicago truncatula</i>                     | <i>Mtr</i> | NC_003119 |
| 67 | <i>Mesostigma viride</i>                       | <i>Mvi</i> | NC_002186 |
| 68 | <i>Nuphar advena</i>                           | <i>Nad</i> | NC_008788 |
| 69 | <i>Nymphaea alba</i>                           | <i>Nal</i> | NC_006050 |
| 70 | <i>Nandina domestica</i>                       | <i>Ndo</i> | NC_008336 |
| 71 | <i>Nasturtium officinale</i>                   | <i>Nof</i> | NC_009275 |
| 72 | <i>Nephroselmis olivacea</i>                   | <i>Nol</i> | NC_000927 |
| 73 | <i>Nicotiana sylvestris</i>                    | <i>Nsy</i> | NC_007500 |
| 74 | <i>Nicotiana tabacum</i>                       | <i>Nta</i> | NC_001879 |
| 75 | <i>Nicotiana tomentosiformis</i>               | <i>Nto</i> | NC_007602 |
| 76 | <i>Oenothera argillicola</i>                   | <i>Oar</i> | NC_010358 |
| 77 | <i>Oenothera biennis</i>                       | <i>Obi</i> | NC_010361 |
| 78 | <i>Oedogonium cardiacum</i>                    | <i>Oca</i> | NC_011031 |
| 79 | <i>Oenothera glazioviana</i>                   | <i>Ogl</i> | NC_010360 |
| 80 | <i>Oryza nivara</i>                            | <i>Oni</i> | NC_005973 |
| 81 | <i>Oenothera parviflora</i>                    | <i>Opa</i> | NC_010362 |
| 82 | <i>Olimarabidopsis pumila</i>                  | <i>Opu</i> | NC_009267 |
| 83 | <i>Oryza sativa (indica cultivar-group)</i>    | <i>Osa</i> | AY522329  |
| 84 | <i>Ostreococcus tauri</i>                      | <i>Ota</i> | NC_008289 |
| 85 | <i>Oltmannsiellopsis viridis</i>               | <i>Ovi</i> | NC_008099 |
| 86 | <i>Pseudendoclonium akinetum</i>               | <i>Pak</i> | NC_008114 |
| 87 | <i>Populus alba</i>                            | <i>Pal</i> | NC_008235 |
| 88 | <i>Phalaenopsis aphrodite subsp. formosana</i> | <i>Pap</i> | NC_007499 |
| 89 | <i>Piper cenocladum</i>                        | <i>Pce</i> | NC_008457 |

|     |                                             |            |           |
|-----|---------------------------------------------|------------|-----------|
| 90  | <i>Panax ginseng</i>                        | <i>Pgi</i> | NC_006290 |
| 91  | <i>Pelargonium x hortorum</i>               | <i>Pho</i> | NC_008454 |
| 92  | <i>Pinus koraiensis</i>                     | <i>Pko</i> | NC_004677 |
| 93  | <i>Psilotum nudum</i>                       | <i>Pnu</i> | NC_003386 |
| 94  | <i>Platanus occidentalis</i>                | <i>Poc</i> | NC_008335 |
| 95  | <i>Physcomitrella patens subsp. patens</i>  | <i>Ppa</i> | NC_005087 |
| 96  | <i>Pinus thunbergii</i>                     | <i>Pth</i> | NC_001631 |
| 97  | <i>Populus trichocarpa</i>                  | <i>Ptr</i> | NC_009143 |
| 98  | <i>Phaseolus vulgaris</i>                   | <i>Pvu</i> | NC_009259 |
| 99  | <i>Ranunculus macranthus</i>                | <i>Rma</i> | NC_008796 |
| 100 | <i>Sorghum bicolor</i>                      | <i>Sbi</i> | NC_008602 |
| 101 | <i>Solanum bulbocastanum</i>                | <i>Sbu</i> | NC_007943 |
| 102 | <i>Stigeoclonium helveticum</i>             | <i>She</i> | NC_008372 |
| 103 | <i>Saccharum hybrid cultivar SP-80-3280</i> | <i>Shy</i> | NC_005878 |
| 104 | <i>Solanum lycopersicum</i>                 | <i>Sly</i> | NC_007898 |
| 105 | <i>Scenedesmus obliquus</i>                 | <i>Sob</i> | NC_008101 |
| 106 | <i>Saccharum officinarum</i>                | <i>Sof</i> | NC_006084 |
| 107 | <i>Spinacia oleracea</i>                    | <i>Sol</i> | NC_002202 |
| 108 | <i>Staurastrum punctulatum</i>              | <i>Spu</i> | NC_008116 |
| 109 | <i>Solanum tuberosum</i>                    | <i>Stu</i> | NC_008096 |
| 110 | <i>Selaginella uncinata</i>                 | <i>Sun</i> | AB197035  |
| 111 | <i>Triticum aestivum</i>                    | <i>Tae</i> | NC_002762 |
| 112 | <i>Trachelium caeruleum</i>                 | <i>Tca</i> | NC_010442 |
| 113 | <i>Vitis vinifera</i>                       | <i>Vvi</i> | NC_007957 |
| 114 | <i>Welwitschia mirabilis</i>                | <i>Wmi</i> | NC_010654 |
| 115 | <i>Zygnema circumcarinatum</i>              | <i>Zci</i> | NC_008117 |
| 116 | <i>Zea mays</i>                             | <i>Zma</i> | NC_001666 |
