# Supplementary material for: A comparative approach to elucidate chloroplast genome replication
Source: PubMed Central journal article supplement (PMC2695485; doi:10.1186/1471-2164-10-237), 2009-05-20
Supplement: 1471-2164-10-237-S2.pdf [file 1471-2164-10-237-S2.pdf]

## Category I

A

| Species    | Region | $B^1/B^1_c$ |       | $A2_c$ |        | $A1$   |        | $B$    |        | $B_c$  |        | $A1_c$ |        | $A2$   |        | $B^1_c/B^1$ |        |
|------------|--------|-------------|-------|--------|--------|--------|--------|--------|--------|--------|--------|--------|--------|--------|--------|-------------|--------|
| <i>Aam</i> | Q      | 187         | 218   | 82     | 1      | 1      | 35     | 23     | 242    | 242    | 23     | 35     | 1      | 1      | 82     | 218         | 187    |
|            | S      | 87660       | 87691 | 101536 | 101617 | 102297 | 102331 | 109079 | 109331 | 127985 | 128237 | 134985 | 135019 | 135699 | 135780 | 149625      | 149656 |
| <i>Aca</i> | Q      | 57          | 25    | 82     | 1      | 1      | 35     | 221    | 2      | 2      | 221    | 35     | 1      | 1      | 82     | 26          | 57     |
|            | S      | 87985       | 88016 | 101861 | 101942 | 102622 | 102656 | 109404 | 109656 | 128315 | 128567 | 135315 | 135349 | 136029 | 136110 | 149955      | 149986 |

B

| Species    | Region | $A2_c$ |        | $A1$   |        | $B^1$  |        | $B$    |        | $B_c$  |        | $B^1_c$ |        | $A1_c$ |        | $A2$   |        |
|------------|--------|--------|--------|--------|--------|--------|--------|--------|--------|--------|--------|---------|--------|--------|--------|--------|--------|
| <i>Jnu</i> | Q      | 82     | 1      | 1      | 35     | 15     | 55     | 162    | 196    | 196    | 162    | 55      | 15     | 35     | 1      | 1      | 82     |
|            | S      | 109761 | 109842 | 110523 | 110557 | 117243 | 117283 | 117315 | 117349 | 140650 | 140684 | 140716  | 140756 | 147442 | 147476 | 148157 | 148238 |
| <i>Lmi</i> | Q      | 82     | 1      | 1      | 35     | 1      | 52     | 152    | 224    | 224    | 152    | 52      | 1      | 35     | 1      | 1      | 82     |
|            | S      | 108166 | 108247 | 108748 | 108782 | 115304 | 115355 | 115434 | 115506 | 140357 | 140429 | 140508  | 140559 | 147081 | 147115 | 147616 | 147697 |

## Category II

C

| Species    | Region | $A2_c$ |        | $A1$   |        | $B$    |        | $B^1_c$ |        | $B_c$  |        | $A1_c$ |        | $A2$   |        |
|------------|--------|--------|--------|--------|--------|--------|--------|---------|--------|--------|--------|--------|--------|--------|--------|
| <i>Pce</i> | Q      | 82     | 1      | 1      | 35     | 1      | 201    | 201     | 131    | 201    | 1      | 35     | 1      | 1      | 82     |
|            | S      | 106633 | 106714 | 107397 | 107431 | 113996 | 114185 | 133502  | 133573 | 134108 | 134297 | 140862 | 140896 | 141579 | 141660 |

## Category III

D

| Species    | Region | $A2_c$ |        | $A1$   |        | $B$    |        | $B_c$  |        | $A1_c$ |        | $A2$   |        |
|------------|--------|--------|--------|--------|--------|--------|--------|--------|--------|--------|--------|--------|--------|
| <i>Aco</i> | Q      | 82     | 1      | 1      | 35     | 74     | 198    | 198    | 74     | 35     | 1      | 1      | 82     |
|            | S      | 102286 | 102367 | 103052 | 103086 | 109678 | 109796 | 127791 | 127909 | 134501 | 134535 | 135220 | 135301 |
| <i>Agr</i> | Q      | 82     | 1      | 1      | 35     | 74     | 198    | 198    | 74     | 35     | 1      | 1      | 82     |
|            | S      | 102331 | 102412 | 103097 | 103131 | 109738 | 109856 | 127876 | 127994 | 134601 | 134635 | 135320 | 135401 |
| <i>Atr</i> | Q      | 82     | 1      | 1      | 35     | 74     | 198    | 198    | 74     | 35     | 1      | 1      | 82     |
|            | S      | 102331 | 102412 | 103097 | 103131 | 109738 | 109856 | 127876 | 127994 | 134601 | 134635 | 135320 | 135401 |
| <i>Ath</i> | Q      | 82     | 1      | 1      | 35     | 74     | 207    | 207    | 74     | 35     | 1      | 1      | 82     |
|            | S      | 103019 | 103100 | 103567 | 103601 | 110182 | 110309 | 128340 | 128467 | 135048 | 135082 | 135549 | 135630 |
| <i>Ahi</i> | Q      | 82     | 1      | 1      | 35     | 74     | 207    | 207    | 74     | 35     | 1      | 1      | 82     |
|            | S      | 101603 | 101684 | 102368 | 102402 | 108990 | 109117 | 127392 | 127519 | 134107 | 134141 | 134825 | 134906 |
| <i>Abe</i> | Q      | 82     | 1      | 1      | 35     | 1      | 243    | 243    | 1      | 35     | 1      | 1      | 82     |
|            | S      | 105079 | 105160 | 105614 | 105648 | 112083 | 112325 | 131232 | 131474 | 137909 | 137943 | 138397 | 138478 |
| <i>Bve</i> | Q      | 82     | 1      | 1      | 35     | 74     | 207    | 207    | 74     | 35     | 1      | 1      | 82     |
|            | S      | 102280 | 102361 | 103046 | 103080 | 109685 | 109812 | 128156 | 128283 | 134888 | 134922 | 135607 | 135688 |
| <i>Bmi</i> | Q      | 82     | 1      | 1      | 35     | 1      | 219    | 219    | 1      | 35     | 1      | 1      | 82     |
|            | S      | 106885 | 106966 | 107651 | 107685 | 114251 | 114463 | 132692 | 132904 | 139470 | 139504 | 140189 | 140270 |
| <i>Cbu</i> | Q      | 82     | 1      | 1      | 35     | 74     | 207    | 207    | 74     | 35     | 1      | 1      | 82     |
|            | S      | 102568 | 102649 | 103335 | 103369 | 109948 | 110075 | 128157 | 128284 | 134863 | 134897 | 135583 | 135664 |
| <i>Cpa</i> | Q      | 82     | 1      | 1      | 35     | 73     | 201    | 201    | 73     | 35     | 1      | 1      | 82     |

|     |   |        |        |        |        |        |        |        |        |        |        |        |        |
|-----|---|--------|--------|--------|--------|--------|--------|--------|--------|--------|--------|--------|--------|
|     | S | 107542 | 107624 | 108311 | 108345 | 114918 | 115049 | 133801 | 133932 | 140505 | 140539 | 141226 | 141308 |
| Csi | Q | 82     | 1      | 1      | 35     | 31     | 210    | 210    | 31     | 35     | 1      | 1      | 82     |
|     | S | 107064 | 107145 | 107846 | 107880 | 114421 | 114594 | 133280 | 133453 | 139994 | 140028 | 140729 | 140810 |
| Car | Q | 82     | 1      | 1      | 35     | 1      | 243    | 243    | 1      | 35     | 1      | 1      | 82     |
|     | S | 103339 | 102412 | 104099 | 104133 | 110708 | 110944 | 129412 | 129648 | 136223 | 136257 | 136935 | 137017 |
| Cwa | Q | 82     | 1      | 1      | 35     | 74     | 207    | 207    | 74     | 35     | 1      | 1      | 82     |
|     | S | 102978 | 103059 | 103744 | 103778 | 110364 | 110491 | 128806 | 128933 | 135553 | 135519 | 136238 | 136319 |
| Csa | Q | 82     | 1      | 1      | 35     | 1      | 187    | 187    | 1      | 35     | 1      | 1      | 82     |
|     | S | 104236 | 104317 | 104871 | 104905 | 111537 | 111718 | 130192 | 130372 | 137004 | 137038 | 137592 | 137673 |
| Cre | Q | 82     | 1      | 1      | 35     | 146    | 124    | 50     | 14     | 35     | 1      | 1      | 82     |
|     | S | 90106  | 90186  | 90869  | 90903  | 103961 | 103983 | 104009 | 104045 | 110087 | 110121 | 110804 | 110884 |
| Dca | Q | 82     | 1      | 1      | 35     | 6      | 224    | 224    | 6      | 35     | 1      | 1      | 82     |
|     | S | 103051 | 103132 | 103822 | 103856 | 110361 | 110573 | 129581 | 129793 | 136298 | 136332 | 137022 | 137103 |
| Dne | Q | 82     | 1      | 1      | 35     | 74     | 207    | 207    | 74     | 35     | 1      | 1      | 82     |
|     | S | 101179 | 101260 | 101946 | 101980 | 108572 | 108699 | 127064 | 127191 | 133783 | 133817 | 134503 | 134584 |
| Fes | Q | 82     | 1      | 1      | 35     | 1      | 229    | 229    | 1      | 35     | 1      | 1      | 82     |
|     | S | 102990 | 103071 | 103755 | 103789 | 110542 | 110764 | 133719 | 133941 | 140694 | 140728 | 141412 | 141493 |
| Gba | Q | 82     | 1      | 1      | 35     | 145    | 120    | 57     | 11     | 35     | 1      | 1      | 82     |
|     | S | 107681 | 107772 | 108469 | 108503 | 133918 | 133943 | 133994 | 134040 | 140656 | 140690 | 141387 | 141468 |
| Ghi | Q | 82     | 1      | 1      | 35     | 11     | 57     | 120    | 145    | 35     | 1      | 1      | 82     |
|     | S | 107661 | 107742 | 108439 | 108473 | 115095 | 115141 | 115192 | 115217 | 140624 | 140658 | 141355 | 141436 |
| Lvi | Q | 82     | 1      | 1      | 35     | 74     | 125    | 125    | 74     | 35     | 1      | 1      | 82     |
|     | S | 102846 | 102927 | 103612 | 103646 | 110275 | 110326 | 128453 | 128504 | 135133 | 135167 | 135852 | 135933 |
| Les | Q | 82     | 1      | 1      | 35     | 1      | 243    | 243    | 1      | 35     | 1      | 1      | 82     |
|     | S | 103983 | 104064 | 104524 | 104558 | 111115 | 111357 | 129981 | 130223 | 136780 | 136814 | 137274 | 137355 |
| Mes | Q | 82     | 1      | 1      | 35     | 61     | 241    | 241    | 61     | 35     | 1      | 1      | 82     |
|     | S | 108248 | 108329 | 108978 | 109012 | 115633 | 115807 | 134902 | 135076 | 141697 | 141731 | 142380 | 142461 |
| Min | Q | 82     | 1      | 1      | 35     | 6      | 169    | 169    | 6      | 35     | 1      | 1      | 82     |
|     | S | 105520 | 105601 | 106283 | 106317 | 112796 | 112947 | 132924 | 133075 | 139554 | 139588 | 140270 | 140351 |
| Nof | Q | 82     | 1      | 1      | 35     | 74     | 207    | 207    | 74     | 35     | 1      | 1      | 82     |
|     | S | 103129 | 103210 | 103896 | 103930 | 110275 | 110649 | 128732 | 128859 | 135451 | 135485 | 135852 | 135933 |
| Nsy | Q | 82     | 1      | 1      | 35     | 1      | 243    | 243    | 1      | 35     | 1      | 1      | 82     |
|     | S | 104769 | 104850 | 105295 | 105329 | 111778 | 112020 | 130606 | 130850 | 137297 | 137331 | 137776 | 137857 |
| Nta | Q | 82     | 1      | 1      | 35     | 1      | 243    | 243    | 1      | 35     | 1      | 1      | 82     |
|     | S | 104771 | 104852 | 105297 | 105331 | 111780 | 112022 | 130608 | 130850 | 137299 | 137333 | 137778 | 137859 |
| Nto | Q | 82     | 1      | 1      | 35     | 1      | 243    | 243    | 1      | 35     | 1      | 1      | 82     |
|     | S | 104541 | 104622 | 105076 | 105110 | 111560 | 111802 | 130336 | 130578 | 137028 | 137062 | 137516 | 137597 |
| Nad | Q | 82     | 1      | 1      | 35     | 205    | 127    | 111    | 1      | 35     | 1      | 1      | 82     |
|     | S | 109210 | 109292 | 109983 | 110017 | 134535 | 134613 | 134617 | 134717 | 141229 | 141263 | 141954 | 142036 |
| Opu | Q | 82     | 1      | 1      | 35     | 74     | 207    | 207    | 74     | 35     | 1      | 1      | 82     |
|     | S | 102730 | 102811 | 103495 | 103529 | 110119 | 110246 | 128375 | 128502 | 135092 | 135126 | 135810 | 135891 |
| Ptr | Q | 82     | 1      | 1      | 35     | 13     | 241    | 241    | 13     | 35     | 1      | 1      | 82     |
|     | S | 104401 | 104482 | 105168 | 105202 | 111833 | 112055 | 130108 | 130330 | 136961 | 136995 | 137681 | 137762 |
| Rma | Q | 82     | 1      | 1      | 35     | 2      | 111    | 131    | 220    | 35     | 1      | 1      | 82     |
|     | S | 102998 | 103080 | 103766 | 103800 | 110987 | 111096 | 111104 | 111199 | 135968 | 136002 | 136688 | 136770 |
| Sbu | Q | 82     | 1      | 1      | 35     | 1      | 243    | 243    | 1      | 35     | 1      | 1      | 82     |
|     | S | 103861 | 103942 | 104402 | 104436 | 111002 | 111244 | 129884 | 130126 | 136692 | 136726 | 137186 | 137267 |

|            |   |        |        |        |        |        |        |        |        |        |        |        |        |
|------------|---|--------|--------|--------|--------|--------|--------|--------|--------|--------|--------|--------|--------|
| <i>Sly</i> | Q | 82     | 1      | 1      | 35     | 1      | 243    | 243    | 1      | 35     | 1      | 1      | 82     |
|            | S | 103986 | 104067 | 104527 | 104561 | 111118 | 111360 | 129984 | 130226 | 136783 | 136817 | 137277 | 137358 |
| <i>Stu</i> | Q | 82     | 1      | 1      | 35     | 1      | 243    | 243    | 1      | 35     | 1      | 1      | 82     |
|            | S | 103814 | 103895 | 104355 | 104389 | 110956 | 111198 | 129838 | 130080 | 136647 | 136681 | 137141 | 137222 |
| <i>Sol</i> | Q | 82     | 1      | 1      | 35     | 23     | 224    | 224    | 23     | 35     | 1      | 1      | 82     |
|            | S | 99955  | 100036 | 100507 | 100541 | 107098 | 107293 | 126152 | 126347 | 132924 | 132938 | 133409 | 133490 |
| <i>Vvi</i> | Q | 82     | 1      | 1      | 35     | 1      | 224    | 224    | 1      | 35     | 1      | 1      | 82     |
|            | S | 107802 | 107883 | 108570 | 108604 | 115133 | 115350 | 134710 | 134927 | 141456 | 141490 | 142177 | 142258 |
| <i>Pal</i> | Q | 82     | 1      | 1      | 35     | 13     | 241    | 241    | 13     | 35     | 1      | 1      | 82     |
|            | S | 103900 | 103981 | 104667 | 104701 | 111332 | 111554 | 129570 | 129792 | 136423 | 136457 | 137143 | 137224 |
| <i>Dgr</i> | Q | 82     | 1      | 1      | 35     | 2      | 217    | 217    | 2      | 35     | 1      | 1      | 82     |
|            | S | 107638 | 107720 | 108409 | 108443 | 115069 | 115272 | 134018 | 134221 | 140847 | 140881 | 141570 | 141652 |
| <i>Egl</i> | Q | 82     | 1      | 1      | 35     | 1      | 228    | 228    | 1      | 35     | 1      | 1      | 82     |
|            | S | 107683 | 107764 | 108455 | 108489 | 115063 | 115278 | 134021 | 134236 | 140810 | 140844 | 141535 | 141616 |
| <i>Csp</i> | Q | 82     | 1      | 1      | 35     | 1      | 223    | 223    | 1      | 35     | 1      | 1      | 82     |
|            | S | 105300 | 105381 | 106074 | 106108 | 112587 | 112797 | 131964 | 132174 | 138653 | 138687 | 139380 | 139461 |
| <i>Pgi</i> | Q | 82     | 1      | 1      | 35     | 3      | 243    | 243    | 3      | 35     | 1      | 1      | 82     |
|            | S | 103939 | 104020 | 104703 | 104737 | 111286 | 111672 | 130753 | 131139 | 137688 | 137722 | 138405 | 138486 |

E

| Species    | Region | A2 <sub>c</sub> |        | A1     |        | B      |        | B <sub>c</sub> |        | A2     |        | A1 <sub>c</sub> |        |
|------------|--------|-----------------|--------|--------|--------|--------|--------|----------------|--------|--------|--------|-----------------|--------|
| <i>Lma</i> | Q      | 82              | 1      | 1      | 35     | 74     | 207    | 207            | 74     | 1      | 82     | 35              | 1      |
|            | S      | 101054          | 101105 | 107596 | 107630 | 108443 | 108570 | 126489         | 126616 | 133924 | 134005 | 140407          | 140441 |

F

| Species    | Region | A2 <sub>c</sub> |        | A1     |        | B      |        | B <sup>1</sup> |        | B <sub>c</sub> |        | A1 <sub>c</sub> |        |
|------------|--------|-----------------|--------|--------|--------|--------|--------|----------------|--------|----------------|--------|-----------------|--------|
| <i>Ndo</i> | Q      | 82              | 1      | 1      | 35     | 1      | 111    | 127            | 241    | 111            | 1      | 35              | 1      |
|            | S      | 104081          | 104163 | 104847 | 104881 | 111402 | 111512 | 111534         | 111649 | 130561         | 130671 | 137192          | 137226 |

Category IV

G

| Species    | Region | A2 <sub>c</sub> |        | A1     |        | B <sub>c</sub> /B |        | A1 <sub>c</sub> |        | A2     |        |
|------------|--------|-----------------|--------|--------|--------|-------------------|--------|-----------------|--------|--------|--------|
| <i>Iol</i> | Q      | 82              | 1      | 1      | 35     | 241               | 1      | 35              | 1      | 1      | 82     |
|            | S      | 106116          | 106197 | 106875 | 106909 | 132878            | 133106 | 139702          | 139736 | 140414 | 140495 |
| <i>Cfe</i> | Q      | 82              | 1      | 1      | 35     | 99                | 2      | 35              | 1      | 1      | 82     |
|            | S      | 103403          | 103485 | 104180 | 104214 | 129461            | 129558 | 136068          | 136102 | 136797 | 136879 |
| <i>Cfl</i> | Q      | 82              | 1      | 1      | 35     | 99                | 2      | 35              | 1      | 1      | 82     |
|            | S      | 103403          | 103485 | 104180 | 104214 | 129461            | 129558 | 136068          | 136102 | 136797 | 136879 |
| <i>Cex</i> | Q      | 82              | 1      | 1      | 35     | 50                | 14     | 35              | 1      | 1      | 82     |
|            | S      | 93303           | 93383  | 94066  | 94100  | 107839            | 107875 | 113995          | 114029 | 114172 | 114792 |
| <i>Nal</i> | Q      | 82              | 1      | 1      | 35     | 111               | 2      | 35              | 1      | 1      | 82     |
|            | S      | 108578          | 108660 | 109351 | 109385 | 134503            | 134162 | 140560          | 140594 | 141285 | 141367 |
| <i>Pap</i> | Q      | 82              | 1      | 1      | 35     | 219               | 125    | 35              | 1      | 1      | 82     |
|            | S      | 105178          | 105258 | 105941 | 105975 | 122277            | 122371 | 128947          | 128981 | 129664 | 129744 |
| <i>Poc</i> | Q      | 82              | 1      | 1      | 35     | 241               | 2      | 35              | 1      | 1      | 82     |

|            |   |        |        |        |        |        |        |        |        |        |        |
|------------|---|--------|--------|--------|--------|--------|--------|--------|--------|--------|--------|
|            | S | 110301 | 110383 | 111062 | 111096 | 136063 | 136296 | 142846 | 142880 | 143559 | 143641 |
| <i>Del</i> | Q | 82     | 1      | 1      | 35     | 1      | 117    | 35     | 1      | 1      | 82     |
|            | S | 101370 | 101452 | 102137 | 102171 | 108676 | 108786 | 133216 | 133250 | 133935 | 134017 |

Category V

H

| Species     | Region | A1 <sub>c</sub> |       | A2    |       | A2 <sub>c</sub> |        | A1     |        |
|-------------|--------|-----------------|-------|-------|-------|-----------------|--------|--------|--------|
| <i>Acav</i> | Q      | 35              | 1     | 32    | 82    | 82              | 32     | 1      | 35     |
|             | S      | 90056           | 90090 | 90844 | 90894 | 141957          | 142007 | 142761 | 142795 |
| <i>Pho</i>  | Q      | 35              | 1     | 32    | 82    | 82              | 32     | 1      | 35     |
|             | S      | 84294           | 84238 | 85022 | 85103 | 192550          | 192631 | 193325 | 193359 |

I

| Species    | Region | A2 <sub>c</sub> |        | A1     |        | A1 <sub>c</sub> |        | A2     |        |
|------------|--------|-----------------|--------|--------|--------|-----------------|--------|--------|--------|
| <i>Ast</i> | Q      | 82              | 1      | 1      | 35     | 35              | 1      | 1      | 82     |
|            | S      | 94785           | 94867  | 95406  | 95440  | 122757          | 122791 | 123330 | 123412 |
| <i>Aev</i> | Q      | 70              | 33     | 1      | 35     | 35              | 1      | 33     | 70     |
|            | S      | 104351          | 104388 | 105092 | 105126 | 138485          | 138519 | 139223 | 139260 |
| <i>Afo</i> | Q      | 82              | 32     | 1      | 35     | 35              | 1      | 32     | 82     |
|            | S      | 115514          | 115564 | 116281 | 116315 | 152351          | 152385 | 153102 | 153152 |
| <i>Ami</i> | Q      | 82              | 32     | 1      | 35     | 35              | 1      | 32     | 82     |
|            | S      | 80087           | 80135  | 80782  | 80816  | 104745          | 104779 | 105426 | 105474 |
| <i>Bdi</i> | Q      | 82              | 1      | 1      | 35     | 35              | 1      | 1      | 82     |
|            | S      | 93045           | 93126  | 93665  | 93699  | 120948          | 120982 | 121521 | 121602 |
| <i>Cde</i> | Q      | 82              | 1      | 1      | 35     | 35              | 1      | 1      | 82     |
|            | S      | 104809          | 104890 | 105577 | 105611 | 137249          | 137283 | 137970 | 138051 |
| <i>Cta</i> | Q      | 82              | 27     | 1      | 35     | 35              | 1      | 27     | 82     |
|            | S      | 107761          | 107816 | 108513 | 108547 | 144715          | 144749 | 145446 | 145501 |
| <i>Gab</i> | Q      | 82              | 1      | 1      | 35     | 35              | 1      | 1      | 82     |
|            | S      | 101652          | 101733 | 102247 | 102281 | 132999          | 133033 | 133549 | 133630 |
| <i>Gma</i> | Q      | 82              | 1      | 1      | 35     | 35              | 1      | 1      | 82     |
|            | S      | 101612          | 101693 | 102384 | 102418 | 132976          | 133010 | 133701 | 133782 |
| <i>Han</i> | Q      | 82              | 1      | 1      | 35     | 35              | 1      | 1      | 82     |
|            | S      | 101226          | 101307 | 101824 | 101858 | 132777          | 132811 | 133328 | 133409 |
| <i>Hvu</i> | Q      | 82              | 1      | 1      | 35     | 35              | 1      | 1      | 82     |
|            | S      | 94706           | 94788  | 95327  | 95361  | 122773          | 122807 | 123346 | 123428 |
| <i>Hlu</i> | Q      | 65              | 25     | 1      | 35     | 35              | 1      | 25     | 65     |
|            | S      | 109059          | 109099 | 109811 | 109845 | 148617          | 148651 | 149363 | 149403 |
| <i>Ipu</i> | Q      | 82              | 1      | 1      | 35     | 35              | 1      | 1      | 82     |
|            | S      | 103842          | 103922 | 104591 | 104625 | 145594          | 145628 | 146297 | 146377 |
| <i>Lsa</i> | Q      | 82              | 1      | 1      | 35     | 35              | 1      | 1      | 82     |
|            | S      | 102198          | 102279 | 102964 | 102998 | 133871          | 133905 | 134590 | 134761 |
| <i>Lpe</i> | Q      | 82              | 1      | 1      | 35     | 35              | 1      | 1      | 82     |
|            | S      | 93491           | 93573  | 94113  | 94147  | 121100          | 121134 | 121674 | 121756 |

|            |   |        |        |        |        |        |        |        |        |
|------------|---|--------|--------|--------|--------|--------|--------|--------|--------|
| <i>Lja</i> | Q | 82     | 1      | 1      | 35     | 35     | 1      | 1      | 82     |
|            | S | 100242 | 100323 | 100782 | 100816 | 131640 | 131674 | 132133 | 132214 |
| <i>Oar</i> | Q | 82     | 1      | 1      | 35     | 35     | 1      | 1      | 82     |
|            | S | 108587 | 108667 | 109353 | 109387 | 144180 | 144214 | 144900 | 144980 |
| <i>Obi</i> | Q | 82     | 1      | 1      | 35     | 35     | 1      | 1      | 82     |
|            | S | 108740 | 108820 | 109506 | 109540 | 144232 | 144266 | 144952 | 145032 |
| <i>Ogl</i> | Q | 82     | 1      | 1      | 35     | 35     | 1      | 1      | 82     |
|            | S | 109272 | 109352 | 110038 | 110072 | 144745 | 144779 | 145465 | 145545 |
| <i>Oni</i> | Q | 82     | 1      | 1      | 35     | 35     | 1      | 1      | 82     |
|            | S | 93270  | 93350  | 94032  | 94066  | 120973 | 121007 | 121689 | 121769 |
| <i>Opa</i> | Q | 82     | 1      | 1      | 35     | 35     | 1      | 1      | 82     |
|            | S | 107406 | 107486 | 108172 | 108206 | 142892 | 142926 | 143612 | 143692 |
| <i>Osa</i> | Q | 82     | 1      | 1      | 35     | 35     | 1      | 1      | 82     |
|            | S | 93275  | 93355  | 94037  | 94071  | 120979 | 121013 | 121695 | 121775 |
| <i>Pvu</i> | Q | 82     | 1      | 1      | 35     | 35     | 1      | 1      | 82     |
|            | S | 99170  | 99250  | 99983  | 99967  | 130142 | 130176 | 130859 | 130939 |
| <i>Shy</i> | Q | 82     | 1      | 1      | 35     | 35     | 1      | 1      | 82     |
|            | S | 18328  | 18410  | 19094  | 19128  | 45590  | 46024  | 46708  | 46790  |
| <i>Sof</i> | Q | 82     | 1      | 1      | 35     | 35     | 1      | 1      | 82     |
|            | S | 97885  | 97967  | 98651  | 98685  | 125546 | 125580 | 126264 | 126346 |
| <i>Sbi</i> | Q | 82     | 1      | 1      | 35     | 35     | 1      | 1      | 82     |
|            | S | 98051  | 98134  | 98818  | 98852  | 125636 | 125670 | 126354 | 126437 |
| <i>Tae</i> | Q | 82     | 1      | 1      | 35     | 35     | 1      | 1      | 82     |
|            | S | 93072  | 93154  | 93693  | 93727  | 121167 | 121201 | 121740 | 121822 |
| <i>Tca</i> | Q | 82     | 1      | 1      | 35     | 35     | 1      | 1      | 82     |
|            | S | 102983 | 103064 | 103730 | 103764 | 158668 | 158702 | 159368 | 159449 |
| <i>Wmi</i> | Q | 82     | 27     | 1      | 35     | 35     | 1      | 27     | 82     |
|            | S | 81848  | 81903  | 82579  | 82613  | 105670 | 105704 | 106380 | 106435 |
| <i>Zma</i> | Q | 82     | 1      | 1      | 35     | 35     | 1      | 1      | 82     |
|            | S | 97174  | 97256  | 97939  | 97973  | 124764 | 124798 | 125481 | 125563 |
| <i>Evi</i> | Q | 82     | 1      | 1      | 30     | 30     | 1      | 1      | 82     |
|            | S | 35600  | 35672  | 36331  | 36360  | 53468  | 53497  | 54156  | 54228  |

J

| Species    | Region | A2 <sub>c</sub> |        | B      |        | B <sub>c</sub> |        | A2     |        |
|------------|--------|-----------------|--------|--------|--------|----------------|--------|--------|--------|
| <i>Ltu</i> | Q      | 82              | 1      | 1      | 170    | 170            | 1      | 1      | 82     |
|            | S      | 106831          | 106912 | 114164 | 114321 | 133716         | 133873 | 141125 | 141206 |

Category VI

K

| Species     | Region | A1     |        | A1 <sub>c</sub> |        |
|-------------|--------|--------|--------|-----------------|--------|
| <i>Chgl</i> | Q      | 1      | 35     | 35              | 1      |
|             | S      | 93689  | 93723  | 126143          | 126177 |
| <i>Cvu</i>  | Q      | 1      | 35     | 35              | 1      |
|             | S      | 140177 | 140211 | 180538          | 180572 |

|            |   |        |        |        |        |
|------------|---|--------|--------|--------|--------|
| <i>Cat</i> | Q | 1      | 35     | 35     | 1      |
|            | S | 111413 | 111447 | 149906 | 149940 |
| <i>Mvi</i> | Q | 1      | 35     | 35     | 1      |
|            | S | 86133  | 86167  | 115821 | 115855 |
| <i>Pnu</i> | Q | 1      | 35     | 35     | 1      |
|            | S | 93912  | 93946  | 129501 | 129535 |
| <i>Sob</i> | Q | 12     | 35     | 35     | 12     |
|            | S | 77069  | 77092  | 156800 | 156823 |
| <i>Ota</i> | Q | 1      | 35     | 35     | 1      |
|            | S | 37271  | 37305  | 69632  | 69666  |
| <i>Ppa</i> | Q | 1      | 35     | 35     | 1      |
|            | S | 88887  | 88921  | 119181 | 119215 |

L

| Species    | Region | A2 <sub>c</sub> |       | A2     |        |
|------------|--------|-----------------|-------|--------|--------|
| <i>Mpo</i> | Q      | 55              | 1     | 1      | 55     |
|            | S      | 84097           | 84151 | 117969 | 118023 |

M

| Species    | Region | A1 <sub>c</sub> |       | A2    |       |
|------------|--------|-----------------|-------|-------|-------|
| <i>Mtr</i> | Q      | 35              | 1     | 1     | 82    |
|            | S      | 24818           | 24852 | 25279 | 25360 |

N

| Species    | Region | A2 <sub>c</sub> |       | A1    |       |
|------------|--------|-----------------|-------|-------|-------|
| <i>Pth</i> | Q      | 82              | 29    | 1     | 35    |
|            | S      | 86427           | 86479 | 87228 | 87262 |
| <i>Pko</i> | Q      | 82              | 1     | 1     | 35    |
|            | S      | 84841           | 84931 | 85646 | 85680 |

Category VII

O

| Species    | Region | A1 <sub>c</sub> /A1 |        |
|------------|--------|---------------------|--------|
| <i>Cja</i> | Q      | 35                  | 1      |
|            | S      | 104617              | 104651 |
| <i>Lte</i> | Q      | 5                   | 35     |
|            | S      | 194733              | 194763 |
| <i>Spu</i> | Q      | 1                   | 35     |
|            | S      | 26788               | 26822  |
| <i>She</i> | Q      | 1                   | 35     |
|            | S      | 223510              | 223544 |
| <i>Zci</i> | Q      | 1                   | 35     |
|            | S      | 132343              | 132377 |
