# Supplementary material for: A comparative approach to elucidate chloroplast genome replication
Source: PubMed Central journal article supplement (PMC2695485; doi:10.1186/1471-2164-10-237), 2009-05-20
Supplement: 1471-2164-10-237-S3.pdf [file 1471-2164-10-237-S3.pdf]

## Category I

A

| Species       | Len    | A2 <sub>c</sub> ->A1 | A1->B       | B->B <sub>c</sub> | B <sub>c</sub> ->A1 <sub>c</sub> | A1->A1 <sub>c</sub> | A1 <sub>c</sub> ->A2 | A2->A2 <sub>c</sub> |
|---------------|--------|----------------------|-------------|-------------------|----------------------------------|---------------------|----------------------|---------------------|
| <i>Aam-C</i>  | 153819 | -1.52                | <b>8.21</b> | -0.66             | <b>-5.37</b>                     | 0.34                | -1.51                | <b>-4.95</b>        |
| <i>Aam-I</i>  |        | -0.04                | -0.78       | <b>-3.18</b>      | <b>-6.87</b>                     | <b>16.19</b>        | -0.80                | <b>9.65</b>         |
| <i>Aam-II</i> |        | 0.03                 | <b>7.6</b>  | 1.91              | <b>2.9</b>                       | <b>-14.96</b>       | -1.18                | <b>-11.49</b>       |
| <i>Aca-C</i>  | 153821 | -1.52                | <b>8.21</b> | -0.68             | <b>-5.34</b>                     | 0.54                | -1.51                | <b>-3.54</b>        |
| <i>Aca-I</i>  |        | -0.04                | -0.70       | <b>-3.21</b>      | <b>-6.78</b>                     | <b>16.34</b>        | -0.80                | <b>9.26</b>         |
| <i>Aca-II</i> |        | 0.03                 | <b>7.65</b> | 1.9               | <b>2.94</b>                      | <b>-15.03</b>       | -1.18                | <b>-10.96</b>       |

B

|               |        |       |             |              |              |               |       |              |
|---------------|--------|-------|-------------|--------------|--------------|---------------|-------|--------------|
| <i>Jnu-C</i>  | 165121 | -1.20 | <b>5.54</b> | <b>-3.34</b> | <b>-4.73</b> | -0.76         | -1.36 | <b>-7.13</b> |
| <i>Jnu-I</i>  |        | -0.35 | -0.19       | <b>3.32</b>  | <b>-5.39</b> | <b>19.34</b>  | -0.85 | <b>6.62</b>  |
| <i>Jnu-II</i> |        | 0.03  | <b>6.37</b> | <b>-4.42</b> | <b>2.55</b>  | <b>-15.79</b> | -0.77 | <b>-11.6</b> |
| <i>Lmi-C</i>  | 165955 | -0.97 | <b>7.19</b> | <b>-2.81</b> | <b>-6.44</b> | -0.29         | -0.95 | <b>-5.57</b> |
| <i>Lmi-I</i>  |        | -0.58 | -0.36       | <b>3.33</b>  | <b>-6.58</b> | <b>10.82</b>  | 0.84  | <b>9.79</b>  |
| <i>Lmi-II</i> |        | 1.00  | <b>7.65</b> | <b>-7.77</b> | <b>2.61</b>  | <b>-18.69</b> | -1.61 | <b>-14.7</b> |

## Category II

C

| Species       | Len    | A2 <sub>c</sub> ->A1 | A1->B       | B->B <sub>c</sub> | B <sub>c</sub> ->A1 <sub>c</sub> | A1->A1 <sub>c</sub> | A1 <sub>c</sub> ->A2 | A2->A2 <sub>c</sub> |
|---------------|--------|----------------------|-------------|-------------------|----------------------------------|---------------------|----------------------|---------------------|
| <i>Pce-C</i>  | 160624 | -0.98                | <b>5.81</b> | 1.14              | <b>-3.56</b>                     | 0.34                | -1.35                | <b>-6.11</b>        |
| <i>Pce-I</i>  |        | -0.39                | -0.77       | -1.34             | <b>-3.96</b>                     | <b>16.23</b>        | -1.08                | <b>6.96</b>         |
| <i>Pce-II</i> |        | -0.08                | <b>6.64</b> | -0.59             | <b>2.35</b>                      | <b>-17.08</b>       | -1.29                | <b>-12.34</b>       |

## Category III

D

| Species       | Len    | A2 <sub>c</sub> ->A1 | A1->B       | B->B <sub>c</sub> | B <sub>c</sub> ->A1 <sub>c</sub> | A1->A1 <sub>c</sub> | A1 <sub>c</sub> ->A2 | A2->A2 <sub>c</sub> |
|---------------|--------|----------------------|-------------|-------------------|----------------------------------|---------------------|----------------------|---------------------|
| <i>Aco-C</i>  | 154168 | -1.12                | <b>5.57</b> | <b>-4.17</b>      | <b>-3.38</b>                     | -0.42               | -0.98                | <b>-6.79</b>        |
| <i>Aco-I</i>  |        | -0.32                | -0.23       | <b>-3.12</b>      | <b>-4.62</b>                     | <b>21.11</b>        | -0.63                | <b>11.48</b>        |
| <i>Aco-II</i> |        | -0.3                 | <b>6.54</b> | -0.25             | <b>3.58</b>                      | <b>-18.19</b>       | -0.71                | <b>-14.32</b>       |
| <i>Agr-C</i>  | 154243 | -0.92                | <b>5.46</b> | <b>-3.76</b>      | <b>-3.35</b>                     | -0.38               | -1.16                | <b>-6.62</b>        |
| <i>Agr-I</i>  |        | -0.19                | -0.24       | <b>-3.53</b>      | <b>-4.64</b>                     | <b>20.45</b>        | -0.66                | <b>10.99</b>        |
| <i>Agr-II</i> |        | -0.42                | <b>6.52</b> | -0.84             | <b>3.61</b>                      | <b>-18.33</b>       | -0.67                | <b>-14.08</b>       |
| <i>Atr-C</i>  | 162686 | -0.74                | <b>5.32</b> | -0.75             | <b>-2.11</b>                     | -0.24               | -1.23                | <b>-8.20</b>        |
| <i>Atr-I</i>  |        | 0.98                 | -0.5        | -0.79             | <b>-3.78</b>                     | <b>15.7</b>         | -1.25                | <b>6.07</b>         |
| <i>Atr-II</i> |        | -0.17                | <b>6.55</b> | 0.32              | <b>2.95</b>                      | <b>-16.49</b>       | -1.31                | <b>-10.96</b>       |
| <i>Ath-C</i>  | 154478 | -0.94                | <b>4.92</b> | -1.72             | <b>-3.43</b>                     | 0.48                | -0.76                | <b>-7.52</b>        |
| <i>Ath-I</i>  |        | -0.87                | -0.04       | <b>-2.24</b>      | <b>-5.05</b>                     | <b>20.53</b>        | 0.55                 | <b>11.83</b>        |
| <i>Ath-II</i> |        | 0.52                 | <b>6.54</b> | 0.03              | <b>3.19</b>                      | <b>-18.58</b>       | -1.14                | <b>-15.24</b>       |
| <i>Ahi-C</i>  | 153689 | -0.95                | <b>5.39</b> | <b>-2.43</b>      | <b>-3.52</b>                     | 0.1                 | -1.09                | <b>-6.91</b>        |
| <i>Ahi-I</i>  |        | -0.41                | -0.25       | <b>-3.13</b>      | <b>-4.7</b>                      | <b>21.01</b>        | -0.66                | <b>12</b>           |
| <i>Ahi-II</i> |        | -0.13                | <b>6.62</b> | 0.57              | <b>3.35</b>                      | <b>-18.96</b>       | -0.73                | <b>-15.07</b>       |
| <i>Abe-C</i>  | 156687 | -1.4                 | <b>4.78</b> | -0.34             | <b>-3.25</b>                     | 0.34                | -0.86                | <b>-6.52</b>        |

|               |        |       |       |       |       |        |       |        |
|---------------|--------|-------|-------|-------|-------|--------|-------|--------|
| <i>Abe-I</i>  |        | -1.38 | -0.47 | -1.82 | -4.37 | 17.09  | 0.28  | 8.36   |
| <i>Abe-II</i> |        | 0.88  | 6.05  | 0.83  | 2.4   | -17.75 | -1.15 | -13.99 |
| <i>Bve-C</i>  | 154532 | -0.84 | 5.61  | -2.00 | -3.38 | -0.04  | -1.05 | -7.25  |
| <i>Bve-I</i>  |        | -0.38 | -0.27 | -3.52 | -4.67 | 20.85  | -0.66 | 11.12  |
| <i>Bve-II</i> |        | -0.13 | 6.87  | -0.32 | 3.43  | -19.81 | -0.49 | -14.8  |
| <i>Bmi-C</i>  | 159010 | -1.43 | 0.46  | -0.80 | -0.78 | 0.42   | -1.22 | -4.83  |
| <i>Bmi-I</i>  |        | -0.14 | -0.18 | -0.94 | -0.63 | 16.17  | -0.65 | 1.32   |
| <i>Bmi-II</i> |        | -0.11 | -0.77 | 1.16  | -0.77 | -17.42 | -1.26 | -3.03  |
| <i>Cbu-C</i>  | 154490 | -0.85 | 5.43  | -2.26 | -3.18 | -0.08  | -0.36 | -7.21  |
| <i>Cbu-I</i>  |        | -0.26 | -0.22 | -2.27 | -4.72 | 20.52  | 0.56  | 12.23  |
| <i>Cbu-II</i> |        | 0.22  | 6.79  | 0.14  | 3.22  | -18.45 | -0.85 | -13.97 |
| <i>Cpa-C</i>  | 160100 | -1.59 | 6     | -1.45 | -3.58 | 0.02   | -0.86 | -7.85  |
| <i>Cpa-I</i>  |        | -0.59 | -0.49 | -2.43 | -4.95 | 18.88  | -0.61 | 9.03   |
| <i>Cpa-II</i> |        | -0.32 | 6.17  | 1.82  | 3.33  | -18    | -0.66 | -15.7  |
| <i>Csp-C</i>  | 157772 | -0.96 | 3.74  | 0.68  | -2.69 | 1.66   | -1.38 | -6.27  |
| <i>Csp-I</i>  |        | -0.16 | 0.24  | -2.15 | -4.13 | 12.24  | -0.93 | 6.97   |
| <i>Csp-II</i> |        | -0.27 | 5.7   | 1.19  | 2.91  | -14    | -1.18 | -10.67 |
| <i>Csi-C</i>  | 160129 | -1.83 | 4.42  | -1.29 | -3.45 | 0.22   | -0.38 | -6.53  |
| <i>Csi-I</i>  |        | -0.8  | -0.2  | -3.58 | -5.04 | 15.74  | -0.44 | 8.1    |
| <i>Csi-II</i> |        | 0.07  | 6.31  | 1.17  | 3.13  | -15.95 | -0.71 | -11.68 |
| <i>Car-C</i>  | 155189 | -1.15 | 5.96  | -0.14 | -3.52 | -0.57  | -1.21 | -6.96  |
| <i>Car-I</i>  |        | -0.32 | -0.69 | -2.58 | -4.18 | 17.12  | -0.52 | 8.15   |
| <i>Car-II</i> |        | -0.26 | 6.18  | 0.2   | 2.48  | -19.75 | -0.91 | -15.68 |
| <i>Cwa-C</i>  | 155199 | -0.81 | 5.55  | -2.71 | -3.49 | -0.32  | 0.10  | -6.46  |
| <i>Cwa-I</i>  |        | -0.07 | -0.21 | -3.01 | -4.86 | 21.23  | 1.17  | 11.66  |
| <i>Cwa-II</i> |        | 0.11  | 6.76  | 0.04  | 3.1   | -19.15 | -0.79 | -14.48 |
| <i>Csa-C</i>  | 155293 | -1.53 | 5.29  | -1.27 | -3.47 | 0.03   | -1.14 | -8.01  |
| <i>Csa-I</i>  |        | -0.39 | -0.5  | -2.57 | -4.56 | 18.18  | 0.67  | 9.89   |
| <i>Csa-II</i> |        | 0.24  | 6.65  | 1.74  | 2.79  | -17.49 | -0.59 | -14.77 |
| <i>Cre-C</i>  | 121521 | -1.74 | 12.98 | -1.14 | -5.24 | 0.68   | -1.13 | -5.88  |
| <i>Cre-I</i>  |        | -0.64 | 6.76  | -0.71 | -6.23 | 13.86  | 1.02  | 7.9    |
| <i>Cre-II</i> |        | -0.28 | -3.88 | -0.89 | 2.68  | -10.88 | -1.44 | -14.98 |
| <i>Dca-C</i>  | 155911 | -1.46 | 5.73  | -0.70 | -3.42 | -0.18  | -0.93 | -6.56  |
| <i>Dca-I</i>  |        | -0.49 | -0.46 | -2.95 | -4.86 | 17.28  | -0.65 | 8.97   |
| <i>Dca-II</i> |        | 0.42  | 6.81  | -1.37 | 2.93  | -19.64 | -1.09 | -13.91 |
| <i>Dne-C</i>  | 153289 | -0.84 | 5.10  | -2.25 | -3.31 | -0.1   | -1.14 | -7.57  |
| <i>Dne-I</i>  |        | -0.4  | -0.54 | -3.21 | -4.63 | 20.91  | -0.65 | 8.69   |
| <i>Dne-II</i> |        | -0.4  | 6.66  | 0.68  | 3.44  | -19.26 | -0.61 | -14.07 |
| <i>Dgr-C</i>  | 160604 | -1.1  | 6.90  | 1.11  | -3.60 | 0.3    | -1.38 | -6.09  |
| <i>Dgr-I</i>  |        | -0.12 | -1.04 | -4.43 | -4.79 | 13.95  | -0.92 | 4.66   |
| <i>Dgr-II</i> |        | -0.13 | 5.94  | 0.9   | 2.85  | -16.92 | -0.7  | -10.35 |
| <i>Egl-C</i>  | 160286 | -1.22 | 6.06  | -1.30 | -3.69 | -0.89  | -1.2  | -7.68  |
| <i>Egl-I</i>  |        | 0     | -0.76 | -6.15 | -4.42 | 17.72  | -0.52 | 7.72   |
| <i>Egl-II</i> |        | 0.15  | 6.86  | 0.35  | 2.94  | -19.2  | -0.58 | -15.91 |
| <i>Gba-C</i>  | 160317 | -1.32 | 12.88 | 1.19  | -5.58 | -0.73  | -1.1  | -7.63  |
| <i>Gba-I</i>  |        | -0.61 | 16.73 | -0.21 | -6.22 | 18.8   | -0.49 | 9.41   |
| <i>Gba-II</i> |        | -0.32 | -4.99 | 0.52  | 2.93  | -14.07 | -0.7  | -15.67 |

|               |        |       |              |              |               |               |              |               |
|---------------|--------|-------|--------------|--------------|---------------|---------------|--------------|---------------|
| <i>Ghi-C</i>  | 160301 | -1.32 | <b>3.83</b>  | <b>2.2</b>   | <b>-16.00</b> | 1.02          | -1.1         | <b>-7.71</b>  |
| <i>Ghi-I</i>  |        | -0.61 | -0.26        | 0.4          | -1.62         | <b>10.48</b>  | -0.49        | <b>8.74</b>   |
| <i>Ghi-II</i> |        | -0.32 | <b>6.06</b>  | 0.7          | <b>-15.54</b> | <b>-15.71</b> | -0.7         | <b>-15.96</b> |
| <i>Lvi-C</i>  | 154743 | -0.77 | <b>5.45</b>  | <b>-2.34</b> | <b>-3.48</b>  | -0.02         | -0.36        | <b>-7.01</b>  |
| <i>Lvi-I</i>  |        | -0.07 | -0.31        | <b>-3.2</b>  | <b>-4.66</b>  | <b>20.71</b>  | 0.55         | <b>11.25</b>  |
| <i>Lvi-II</i> |        | 0.08  | <b>6.44</b>  | -0.18        | <b>3.32</b>   | <b>-18.98</b> | -0.85        | <b>-14.75</b> |
| <i>Les-C</i>  | 155461 | -1.42 | <b>5.91</b>  | 0.26         | <b>-3.14</b>  | 0.12          | -0.87        | <b>-6.85</b>  |
| <i>Les-I</i>  |        | -0.99 | -0.56        | <b>-2.27</b> | <b>-4.02</b>  | <b>16.58</b>  | 0.28         | <b>7.42</b>   |
| <i>Les-II</i> |        | 0.66  | <b>6.48</b>  | 1.56         | <b>2.72</b>   | <b>-18.34</b> | -1.14        | <b>-13.59</b> |
| <i>Mes-C</i>  | 161453 | -0.99 | <b>6.24</b>  | -1.12        | <b>-3.86</b>  | -0.05         | -1.02        | <b>-4.21</b>  |
| <i>Mes-I</i>  |        | -0.91 | -0.91        | <b>-2.66</b> | <b>-5.08</b>  | <b>20.1</b>   | -0.49        | <b>14.65</b>  |
| <i>Mes-II</i> |        | 0.61  | <b>6.73</b>  | -0.34        | <b>2.94</b>   | <b>-20.9</b>  | -0.64        | <b>-16.79</b> |
| <i>Min-C</i>  | 158484 | -1.82 | <b>5.7</b>   | <b>-2.35</b> | <b>-2.89</b>  | -0.47         | -1.27        | <b>-7.26</b>  |
| <i>Min-I</i>  |        | -0.64 | -0.7         | <b>-4.35</b> | <b>-4.43</b>  | <b>20.6</b>   | -0.62        | <b>10.42</b>  |
| <i>Min-II</i> |        | -0.1  | <b>6.62</b>  | 1.43         | <b>3.43</b>   | <b>-19.65</b> | -0.59        | <b>-15.77</b> |
| <i>Ndo-C</i>  | 156599 | -1.47 | <b>6.01</b>  | 0.24         | 0.41          | 0.28          | <b>-3.82</b> | <b>-4.83</b>  |
| <i>Ndo-I</i>  |        | -0.64 | -0.75        | 0.22         | <b>-3.13</b>  | <b>16.35</b>  | <b>-4.85</b> | <b>9.14</b>   |
| <i>Ndo-II</i> |        | 0.21  | <b>6.4</b>   | 0.43         | 1.26          | <b>-18.75</b> | <b>2.94</b>  | <b>-12.21</b> |
| <i>Nof-C</i>  | 155105 | -1.01 | <b>5.47</b>  | <b>-2.39</b> | <b>-3.40</b>  | -0.01         | -1.04        | <b>-7.39</b>  |
| <i>Nof-I</i>  |        | -0.52 | -0.19        | <b>-2.92</b> | <b>-4.75</b>  | <b>20.67</b>  | -0.76        | <b>11.5</b>   |
| <i>Nof-II</i> |        | -0.08 | <b>6.83</b>  | -0.36        | <b>3.46</b>   | <b>-19.22</b> | -0.61        | <b>-14.99</b> |
| <i>Nsy-C</i>  | 155941 | -1.60 | <b>5.83</b>  | -0.33        | <b>-3.06</b>  | 0.16          | -1.35        | <b>-7.34</b>  |
| <i>Nsy-I</i>  |        | -1.66 | -0.52        | <b>-2.04</b> | <b>-4.33</b>  | <b>16.66</b>  | 0.76         | <b>7.78</b>   |
| <i>Nsy-II</i> |        | -0.7  | <b>6.47</b>  | 1.15         | <b>2.61</b>   | <b>-17.4</b>  | -0.51        | <b>-13.52</b> |
| <i>Nta-C</i>  | 155943 | -1.55 | <b>5.83</b>  | <b>-5.82</b> | <b>-5.06</b>  | 0.62          | -0.83        | <b>-7.02</b>  |
| <i>Nta-I</i>  |        | -1.84 | -0.55        | -1.53        | <b>-5.26</b>  | <b>18.19</b>  | 0.06         | <b>7.96</b>   |
| <i>Nta-II</i> |        | 0.41  | -0.55        | <b>-3.56</b> | <b>2.93</b>   | <b>-14.94</b> | -1.44        | <b>-13.52</b> |
| <i>Nto-C</i>  | 155745 | -1.38 | <b>5.87</b>  | -0.99        | <b>-3.01</b>  | -0.03         | -0.86        | <b>-7.17</b>  |
| <i>Nto-I</i>  |        | -1.18 | -0.47        | <b>-2.2</b>  | <b>-4.2</b>   | <b>16.86</b>  | 0.28         | <b>7.83</b>   |
| <i>Nto-II</i> |        | 0.71  | <b>6.4</b>   | 0.57         | <b>2.62</b>   | <b>-17.42</b> | -1.15        | <b>-13.73</b> |
| <i>Nad-C</i>  | 160866 | -1.23 | <b>12.72</b> | <b>-2.83</b> | <b>-5.12</b>  | 0.76          | -1.27        | <b>-5.99</b>  |
| <i>Nad-I</i>  |        | 0.08  | <b>13.2</b>  | -            | <b>-6.16</b>  | <b>15.59</b>  | -1.28        | <b>6.95</b>   |
| <i>Nad-II</i> |        | 0.38  | <b>-3.12</b> | <b>-2.83</b> | <b>2.82</b>   | <b>-12.74</b> | -1.23        | <b>-9.69</b>  |
| <i>Opu-C</i>  | 154737 | -0.81 | <b>5.39</b>  | <b>-2.19</b> | <b>-3.28</b>  | 0.2           | -1.04        | <b>-6.93</b>  |
| <i>Opu-I</i>  |        | -0.5  | -0.21        | <b>-2.52</b> | <b>-4.75</b>  | <b>20.83</b>  | -0.73        | <b>10.98</b>  |
| <i>Opu-II</i> |        | -0.19 | <b>6.63</b>  | -0.62        | <b>3.31</b>   | <b>-19.31</b> | -0.5         | <b>-14.42</b> |
| <i>Pgi-C</i>  | 156318 | -1.57 | <b>6.02</b>  | -1.21        | <b>-2.65</b>  | -0.54         | -1.09        | <b>-6.99</b>  |
| <i>Pgi-I</i>  |        | -0.7  | -0.31        | <b>-3.17</b> | <b>-4.57</b>  | <b>16.98</b>  | -0.52        | <b>7.8</b>    |
| <i>Pgi-II</i> |        | -0.25 | <b>6.57</b>  | -0.78        | <b>3.03</b>   | <b>-19.91</b> | -0.73        | <b>-12.96</b> |
| <i>Pal-C</i>  | 156505 | -1.44 | <b>6.43</b>  | 0.60         | <b>-4.85</b>  | 0.77          | -1.06        | <b>-6.06</b>  |
| <i>Pal-I</i>  |        | -0.38 | -0.7         | -0.71        | <b>-5.25</b>  | <b>18.34</b>  | -0.45        | <b>8.52</b>   |
| <i>Pal-II</i> |        | -0.2  | <b>7.02</b>  | 0.95         | <b>2.61</b>   | <b>-19.31</b> | -0.6         | <b>-15.11</b> |
| <i>Ptr-C</i>  | 157033 | -1.42 | <b>6.4</b>   | 1.02         | <b>-4.90</b>  | -0.42         | -1.06        | <b>-6.55</b>  |
| <i>Ptr-I</i>  |        | -0.23 | -0.95        | -1           | <b>-5.23</b>  | <b>14.84</b>  | -0.45        | <b>8.52</b>   |
| <i>Ptr-II</i> |        | -0.33 | <b>7.04</b>  | -0.17        | <b>2.66</b>   | <b>-14.82</b> | -0.6         | <b>-15.21</b> |
| <i>Rma-C</i>  | 155129 | -1.61 | <b>8.16</b>  | -            | <b>-15.70</b> | 0.76          | -1.19        | <b>-7.22</b>  |
| <i>Rma-I</i>  |        | -0.35 | -1.14        | -            | -0.53         | <b>17.01</b>  | -0.75        | <b>8.13</b>   |

|               |        |       |             |              |               |               |       |               |
|---------------|--------|-------|-------------|--------------|---------------|---------------|-------|---------------|
| <i>Rma-II</i> |        | -0.05 | <b>6.5</b>  | -            | <b>-16.33</b> | <b>-15.37</b> | -0.72 | <b>-13.84</b> |
| <i>Sbu-C</i>  | 155371 | -1.42 | <b>6.02</b> | 0.62         | <b>-3.24</b>  | -0.12         | -0.87 | <b>-7.14</b>  |
| <i>Sbu-I</i>  |        | -0.99 | -0.6        | <b>-3.85</b> | <b>-4.11</b>  | <b>15.85</b>  | 0.28  | <b>5.87</b>   |
| <i>Sbu-II</i> |        | 0.66  | <b>6.51</b> | 0.92         | <b>2.8</b>    | <b>-17.89</b> | -1.14 | <b>-12.97</b> |
| <i>Sly-C</i>  | 155461 | -1.44 | <b>4.69</b> | 1.04         | <b>-3.14</b>  | 0.19          | -0.87 | <b>-7.33</b>  |
| <i>Sly-I</i>  |        | -1.18 | 0.14        | <b>-3.48</b> | <b>-4.02</b>  | <b>16.12</b>  | 0.28  | <b>5.98</b>   |
| <i>Sly-II</i> |        | 0.83  | <b>6.53</b> | 1.38         | <b>2.72</b>   | <b>-17.42</b> | -1.14 | <b>-13.14</b> |
| <i>Stu-C</i>  | 155298 | -1.44 | <b>6.14</b> | 0.31         | <b>-3.24</b>  | -0.09         | -0.87 | <b>-7.30</b>  |
| <i>Stu-I</i>  |        | -1.18 | -0.4        | <b>-3.78</b> | <b>-4.16</b>  | <b>16.04</b>  | 0.28  | <b>5.92</b>   |
| <i>Stu-II</i> |        | 0.83  | <b>6.48</b> | 1.03         | <b>2.76</b>   | <b>-17.4</b>  | -1.14 | <b>-13.15</b> |
| <i>Sol-C</i>  | 150725 | -0.91 | <b>5.7</b>  | -1.23        | <b>-2.22</b>  | -0.72         | -1.08 | <b>-7.83</b>  |
| <i>Sol-I</i>  |        | -0.86 | -1          | <b>-3.07</b> | <b>-3.84</b>  | <b>20.14</b>  | 0.65  | <b>9.98</b>   |
| <i>Sol-II</i> |        | 1.17  | <b>6.62</b> | 1.63         | <b>3.11</b>   | <b>-19.6</b>  | -0.96 | <b>-15.26</b> |
| <i>Vvi-C</i>  | 160928 | -1.56 | <b>6.05</b> | 0.03         | <b>-3.27</b>  | -0.08         | -0.97 | <b>-7.71</b>  |
| <i>Vvi-I</i>  |        | -0.38 | -0.6        | <b>-5.57</b> | <b>-4.7</b>   | <b>16.29</b>  | -0.73 | <b>7.81</b>   |
| <i>Vvi-II</i> |        | -0.14 | <b>6.75</b> | 0.18         | <b>2.99</b>   | <b>-18.95</b> | -1.11 | <b>-12.7</b>  |

E

|               |        |             |       |             |              |              |             |               |
|---------------|--------|-------------|-------|-------------|--------------|--------------|-------------|---------------|
| <i>Lma-C</i>  | 152659 | <b>3.05</b> | 0.39  | -1.58       | <b>-1.96</b> | -0.87        | <b>7.48</b> | <b>-12.48</b> |
| <i>Lma-I</i>  |        | -1.52       | -0.73 | <b>-2.6</b> | <b>-5.51</b> | <b>21.22</b> | <b>6.31</b> | <b>3.28</b>   |
| <i>Lma-II</i> |        | <b>4.8</b>  | 0.58  | 0.42        | <b>4.06</b>  | <b>-5.3</b>  | -0.12       | <b>-13.44</b> |

Category IV

| <b>Species</b> | <b>Len</b> | <b>A2<sub>c</sub>-&gt;A1</b> | <b>A1-&gt;B</b> | <b>B-&gt;B<sub>c</sub></b> | <b>B<sub>c</sub>-&gt;A1<sub>c</sub></b> | <b>A1-&gt;A1<sub>c</sub></b> | <b>A1<sub>c</sub>-&gt;A2</b> | <b>A2-&gt;A2<sub>c</sub></b> |
|----------------|------------|------------------------------|-----------------|----------------------------|-----------------------------------------|------------------------------|------------------------------|------------------------------|
| <i>Cex-C</i>   | 125373     | -1.74                        | -               | -                          | <b>-4.16</b>                            | -0.76                        | -1.15                        | <b>-8.58</b>                 |
| <i>Cex-I</i>   |            | -0.83                        | -               | -                          | <b>-5.62</b>                            | <b>15.36</b>                 | 0.49                         | <b>6.38</b>                  |
| <i>Cex-II</i>  |            | 0.2                          | -               | -                          | <b>3.04</b>                             | <b>-13.08</b>                | -1.49                        | <b>-15.37</b>                |
| <i>Cfe-C</i>   | 153337     | -0.98                        | -               | -                          | <b>-3.19</b>                            | -0.68                        | -1.55                        | <b>-5.19</b>                 |
| <i>Cfe-I</i>   |            | -0.11                        | -               | -                          | <b>-4.66</b>                            | <b>15.27</b>                 | -1.05                        | <b>5.35</b>                  |
| <i>Cfe-II</i>  |            | -0.62                        | -               | -                          | <b>2.93</b>                             | <b>-16.39</b>                | -1.04                        | <b>-8.74</b>                 |
| <i>Cfl-C</i>   | 153337     | -0.98                        | -               | -                          | <b>-3.19</b>                            | -0.68                        | -1.55                        | <b>-5.19</b>                 |
| <i>Cfl-I</i>   |            | -0.11                        | -               | -                          | <b>-4.66</b>                            | <b>15.27</b>                 | -1.05                        | <b>5.35</b>                  |
| <i>Cfl-II</i>  |            | -0.62                        | -               | -                          | <b>2.93</b>                             | <b>-16.39</b>                | -1.04                        | <b>-8.74</b>                 |
| <i>Del-C</i>   | 152609     | -1.15                        | -               | -                          | <b>-16.79</b>                           | <b>1.99</b>                  | -1.26                        | <b>-6.03</b>                 |
| <i>Del-I</i>   |            | 0.17                         | -               | -                          | <b>-2.26</b>                            | <b>14.25</b>                 | -0.7                         | <b>6.94</b>                  |
| <i>Del-II</i>  |            | 0.16                         | -               | -                          | <b>-14.3</b>                            | <b>-16.69</b>                | -0.89                        | <b>-14.02</b>                |
| <i>Iol-C</i>   | 148553     | -1.11                        | -               | -                          | <b>-3.54</b>                            | -0.14                        | -1.4                         | <b>-6.31</b>                 |
| <i>Iol-I</i>   |            | -0.1                         | -               | -                          | <b>-4.68</b>                            | <b>14.8</b>                  | -0.56                        | <b>4.8</b>                   |
| <i>Iol-II</i>  |            | 0.06                         | -               | -                          | <b>3.1</b>                              | <b>-14.96</b>                | -1.04                        | <b>-9.48</b>                 |
| <i>Nal-C</i>   | 159930     | -1.2                         | -               | -                          | <b>-3.08</b>                            | 0.08                         | -0.71                        | <b>-5.87</b>                 |
| <i>Nal-I</i>   |            | -0.07                        | -               | -                          | <b>-5.11</b>                            | <b>14.62</b>                 | 0.67                         | <b>6.89</b>                  |
| <i>Nal-II</i>  |            | 0.37                         | -               | -                          | <b>3.05</b>                             | <b>-14.35</b>                | -0.08                        | <b>-9.78</b>                 |
| <i>Pap-C</i>   | 148964     | -0.4                         | -               | -                          | <b>-5.84</b>                            | 1.27                         | <b>-2.02</b>                 | <b>-5.29</b>                 |
| <i>Pap-I</i>   |            | -0.54                        | -               | -                          | <b>-6.42</b>                            | <b>18.79</b>                 | -0.77                        | <b>11.52</b>                 |
| <i>Pap-II</i>  |            | 0.24                         | -               | -                          | <b>2.51</b>                             | <b>-15.42</b>                | -1.43                        | <b>-14.95</b>                |

|               |        |       |   |   |              |               |       |               |
|---------------|--------|-------|---|---|--------------|---------------|-------|---------------|
| <i>Poc-C</i>  | 161791 | -0.96 | - | - | <b>-3.73</b> | -0.12         | -1.4  | <b>-7.26</b>  |
| <i>Poc-I</i>  |        | -0.12 | - | - | <b>-4.99</b> | <b>15.1</b>   | -0.7  | <b>4.99</b>   |
| <i>Poc-II</i> |        | 0.28  | - | - | <b>2.82</b>  | <b>-17.13</b> | -0.75 | <b>-13.15</b> |

Category V

| <b>Species</b> | <b>Len</b> | <b>A2<sub>c</sub>-&gt;A1</b> | <b>A1-&gt;B</b> | <b>B-&gt;B<sub>c</sub></b> | <b>B<sub>c</sub>-&gt;A1<sub>c</sub></b> | <b>A1-&gt;A1<sub>c</sub></b> | <b>A1<sub>c</sub>-&gt;A2</b> | <b>A2-&gt;A2<sub>c</sub></b> |
|----------------|------------|------------------------------|-----------------|----------------------------|-----------------------------------------|------------------------------|------------------------------|------------------------------|
| <i>Acav-C</i>  | 150568     | -1.36                        | -               | -                          | -                                       | -1.1                         | 0.88                         | -1.48                        |
| <i>Acav-I</i>  |            | -1.77                        | -               | -                          | -                                       | <b>11.58</b>                 | 0.8                          | <b>9.94</b>                  |
| <i>Acav-II</i> |            | 0.87                         | -               | -                          | -                                       | <b>-11.6</b>                 | 1.1                          | <b>-7.41</b>                 |
| <i>Aev-C</i>   | 153901     | -0.27                        | -               | -                          | -                                       | 0.7                          | -0.56                        | <b>-7.45</b>                 |
| <i>Aev-I</i>   |            | 0.86                         | -               | -                          | -                                       | <b>17.52</b>                 | -0.54                        | <b>7.43</b>                  |
| <i>Aev-II</i>  |            | -0.35                        | -               | -                          | -                                       | <b>-14.48</b>                | 0.32                         | <b>-10.07</b>                |
| <i>Afo-C</i>   | 161162     | -0.62                        | -               | -                          | -                                       | <b>2.1</b>                   | -1.5                         | -1.84                        |
| <i>Afo-I</i>   |            | 1.72                         | -               | -                          | -                                       | <b>19.16</b>                 | -0.12                        | <b>5.77</b>                  |
| <i>Afo-II</i>  |            | 0.78                         | -               | -                          | -                                       | <b>-17.95</b>                | 0                            | <b>-10.51</b>                |
| <i>Ast-C</i>   | 136584     | -1.02                        | -               | -                          | -                                       | 1.11                         | -1.39                        | <b>-3.17</b>                 |
| <i>Ast-I</i>   |            | 0.38                         | -               | -                          | -                                       | <b>16.26</b>                 | 0.13                         | <b>9.75</b>                  |
| <i>Ast-II</i>  |            | -0.67                        | -               | -                          | -                                       | <b>-15.21</b>                | 0.23                         | <b>-12.16</b>                |
| <i>Cde-C</i>   | 156252     | -1.26                        | -               | -                          | -                                       | -0.78                        | -1.49                        | <b>-6.84</b>                 |
| <i>Cde-I</i>   |            | 0.04                         | -               | -                          | -                                       | <b>16.41</b>                 | -1.46                        | <b>6.62</b>                  |
| <i>Cde-II</i>  |            | 0.32                         | -               | -                          | -                                       | <b>-14.95</b>                | -0.96                        | <b>-13</b>                   |
| <i>Cta-C</i>   | 163403     | -0.62                        | -               | -                          | -                                       | 0.82                         | -1.55                        | <b>-6.57</b>                 |
| <i>Cta-I</i>   |            | 0.43                         | -               | -                          | -                                       | <b>16.4</b>                  | -1.42                        | <b>3.41</b>                  |
| <i>Cta-II</i>  |            | 1.27                         | -               | -                          | -                                       | <b>-14.56</b>                | -0.57                        | <b>-6.32</b>                 |
| <i>Evi-C</i>   | 70028      | <b>-2.22</b>                 | -               | -                          | -                                       | -0.44                        | -0.93                        | <b>-5.39</b>                 |
| <i>Evi-I</i>   |            | -0.66                        | -               | -                          | -                                       | <b>14.68</b>                 | 0.11                         | <b>9.93</b>                  |
| <i>Evi-II</i>  |            | -0.11                        | -               | -                          | -                                       | <b>-6.92</b>                 | -0.18                        | <b>-14.1</b>                 |
| <i>Gma-C</i>   | 152218     | -1.46                        | -               | -                          | -                                       | 0.44                         | -0.79                        | <b>-5.19</b>                 |
| <i>Gma-I</i>   |            | -0.15                        | -               | -                          | -                                       | <b>16.7</b>                  | -0.59                        | <b>8.19</b>                  |
| <i>Gma-II</i>  |            | -0.14                        | -               | -                          | -                                       | <b>-16.49</b>                | -0.57                        | <b>-15.81</b>                |
| <i>Han-C</i>   | 151104     | -1.58                        | -               | -                          | -                                       | 1.34                         | -0.85                        | <b>-6.22</b>                 |
| <i>Han-I</i>   |            | -0.74                        | -               | -                          | -                                       | <b>12.32</b>                 | 0.74                         | <b>5.24</b>                  |
| <i>Han-II</i>  |            | 0.06                         | -               | -                          | -                                       | <b>-15.54</b>                | -1.43                        | <b>-14.1</b>                 |
| <i>Hlu-C</i>   | 154373     | -0.34                        | -               | -                          | -                                       | <b>18.81</b>                 | -1.91                        | <b>-2.78</b>                 |
| <i>Hlu-I</i>   |            | -0.64                        | -               | -                          | -                                       | <b>14.14</b>                 | -1.61                        | <b>-5.35</b>                 |
| <i>Hlu-II</i>  |            | 0.65                         | -               | -                          | -                                       | <b>2.09</b>                  | 0.32                         | <b>-6.79</b>                 |
| <i>Hvu-C</i>   | 136462     | -1.47                        | -               | -                          | -                                       | 0.81                         | -1.03                        | <b>-4.95</b>                 |
| <i>Hvu-I</i>   |            | -0.12                        | -               | -                          | -                                       | <b>17.29</b>                 | 0.38                         | <b>9.08</b>                  |
| <i>Hvu-II</i>  |            | 0.09                         | -               | -                          | -                                       | <b>-15.28</b>                | -0.7                         | <b>-11.78</b>                |
| <i>Ipu-C</i>   | 162046     | -1.31                        | -               | -                          | -                                       | 1.82                         | -1.1                         | <b>-7.25</b>                 |
| <i>Ipu-I</i>   |            | -0.24                        | -               | -                          | -                                       | <b>17.64</b>                 | 0.1                          | <b>6.56</b>                  |
| <i>Ipu-II</i>  |            | 0.17                         | -               | -                          | -                                       | <b>-16.92</b>                | -1.32                        | <b>-13.06</b>                |
| <i>Lja-C</i>   | 150519     | -1.46                        | -               | -                          | -                                       | -0.13                        | -0.65                        | <b>-6.47</b>                 |
| <i>Lja-I</i>   |            | -1.39                        | -               | -                          | -                                       | <b>17.98</b>                 | 0.45                         | <b>9.31</b>                  |
| <i>Lja-II</i>  |            | 0.68                         | -               | -                          | -                                       | <b>-19.31</b>                | -0.82                        | <b>-17.8</b>                 |
| <i>Lpe-C</i>   | 135282     | -1.58                        | -               | -                          | -                                       | 0.93                         | -1.18                        | <b>-3.02</b>                 |

|               |        |              |   |   |   |               |              |               |
|---------------|--------|--------------|---|---|---|---------------|--------------|---------------|
| <i>Lpe-I</i>  |        | -0.14        | - | - | - | <b>16.49</b>  | 0.29         | <b>9.76</b>   |
| <i>Lpe-II</i> |        | 0.07         | - | - | - | <b>-14.84</b> | -0.58        | <b>-12.55</b> |
| <i>Lsa-C</i>  | 152765 | -1.8         | - | - | - | 0.73          | -1.08        | <b>-4.81</b>  |
| <i>Lsa-I</i>  |        | -0.6         | - | - | - | <b>18.15</b>  | -0.69        | <b>6.45</b>   |
| <i>Lsa-II</i> |        | -0.07        | - | - | - | <b>-16</b>    | -0.91        | <b>-13.19</b> |
| <i>Ltu-C</i>  | 159886 | <b>4.86</b>  | - | - | - | 0.06          | -1.83        | <b>-6.72</b>  |
| <i>Ltu-I</i>  |        | -1.21        | - | - | - | <b>15.37</b>  | <b>-5.52</b> | <b>5.84</b>   |
| <i>Ltu-II</i> |        | <b>7.25</b>  | - | - | - | <b>-14.93</b> | <b>2.98</b>  | <b>-10.73</b> |
| <i>Oni-C</i>  | 134494 | -1.58        | - | - | - | 0.85          | -1.08        | <b>-3.64</b>  |
| <i>Oni-I</i>  |        | -0.35        | - | - | - | <b>15.98</b>  | -0.33        | <b>7.81</b>   |
| <i>Oni-II</i> |        | -0.32        | - | - | - | <b>-14.62</b> | -0.57        | <b>-11.08</b> |
| <i>Osa-C</i>  | 134496 | -1.58        | - | - | - | 1.33          | -1.08        | <b>-4.84</b>  |
| <i>Osa-I</i>  |        | -0.35        | - | - | - | <b>15.92</b>  | -0.33        | <b>6.66</b>   |
| <i>Osa-II</i> |        | -0.32        | - | - | - | <b>-15.24</b> | -0.57        | <b>-10.34</b> |
| <i>Pvu-C</i>  | 150285 | -1.39        | - | - | - | 0.43          | -0.7         | <b>-7.14</b>  |
| <i>Pvu-I</i>  |        | -0.19        | - | - | - | <b>19.04</b>  | -0.65        | <b>11</b>     |
| <i>Pvu-II</i> |        | 0.18         | - | - | - | <b>-20.22</b> | -0.39        | <b>-17</b>    |
| <i>Sbi-C</i>  | 140754 | -1.81        | - | - | - | 0.97          | -1.01        | <b>-4.53</b>  |
| <i>Sbi-I</i>  |        | -0.32        | - | - | - | <b>17.14</b>  | -0.78        | <b>8.9</b>    |
| <i>Sbi-II</i> |        | -0.31        | - | - | - | <b>-15.1</b>  | -0.85        | <b>-12.66</b> |
| <i>Shy-C</i>  | 141182 | -1.77        | - | - | - | 0.68          | -1.12        | <b>-3.32</b>  |
| <i>Shy-I</i>  |        | -0.32        | - | - | - | <b>15.82</b>  | 1.12         | <b>8.08</b>   |
| <i>Shy-II</i> |        | -0.35        | - | - | - | <b>-15.07</b> | 0.68         | <b>-11.36</b> |
| <i>Sof-C</i>  | 141182 | -1.71        | - | - | - | 0.37          | -1.05        | <b>-3.89</b>  |
| <i>Sof-I</i>  |        | -0.53        | - | - | - | <b>16.85</b>  | -0.88        | <b>8.31</b>   |
| <i>Sof-II</i> |        | 0.02         | - | - | - | <b>-14.87</b> | -1           | <b>-12.99</b> |
| <i>Tae-C</i>  | 134545 | -1.57        | - | - | - | 0.51          | -1.03        | <b>-2.82</b>  |
| <i>Tae-I</i>  |        | -0.24        | - | - | - | <b>17.71</b>  | 0.5          | <b>9.95</b>   |
| <i>Tae-II</i> |        | 0.07         | - | - | - | <b>-15.13</b> | -0.41        | <b>-12.83</b> |
| <i>Zma-C</i>  | 140384 | <b>-2.04</b> | - | - | - | 0.61          | -1.05        | <b>-3.51</b>  |
| <i>Zma-I</i>  |        | -0.13        | - | - | - | <b>16.93</b>  | -0.75        | <b>9.34</b>   |
| <i>Zma-II</i> |        | -0.37        | - | - | - | <b>-14.55</b> | -0.84        | <b>-13.33</b> |
| <i>Pho-C</i>  | 217942 | -1.06        | - | - | - | <b>-5.98</b>  | -1.47        | <b>-6.17</b>  |
| <i>Pho-I</i>  |        | -0.67        | - | - | - | <b>4.95</b>   | -0.46        | <b>5.27</b>   |
| <i>Pho-II</i> |        | -1.06        | - | - | - | <b>-12.46</b> | 0.46         | <b>-12.95</b> |

Category VI

| Species        | Len    | A2 <sub>c</sub> ->A1 | A1->A2 <sub>c</sub> | A1->A1 <sub>c</sub> | A1 <sub>c</sub> ->A1 | A1 <sub>c</sub> ->A2 | A2->A1 <sub>c</sub> | A2 <sub>c</sub> ->A2 | A2->A2 <sub>c</sub> |
|----------------|--------|----------------------|---------------------|---------------------|----------------------|----------------------|---------------------|----------------------|---------------------|
| <i>Cat-C</i>   | 152254 | -                    | -                   | <b>9.82</b>         | <b>-3.64</b>         | -                    | -                   | -                    | -                   |
| <i>Cat-I</i>   |        | -                    | -                   | <b>4.96</b>         | <b>6.64</b>          | -                    | -                   | -                    | -                   |
| <i>Cat-II</i>  |        | -                    | -                   | -1.9                | <b>-5.89</b>         | -                    | -                   | -                    | -                   |
| <i>Chgl-C</i>  | 131183 | -                    | -                   | <b>3.83</b>         | <b>-10.02</b>        | -                    | -                   | -                    | -                   |
| <i>Chgl-I</i>  |        | -                    | -                   | <b>22.66</b>        | <b>6.18</b>          | -                    | -                   | -                    | -                   |
| <i>Chgl-II</i> |        | -                    | -                   | <b>-20.64</b>       | <b>-12.61</b>        | -                    | -                   | -                    | -                   |
| <i>Cvu-C</i>   | 184933 | -                    | -                   | <b>15.92</b>        | <b>-2.9</b>          | -                    | -                   | -                    | -                   |
| <i>Cvu-I</i>   |        | -                    | -                   | <b>19.46</b>        | 1.57                 | -                    | -                   | -                    | -                   |

|               |        |       |              |               |               |       |              |              |               |
|---------------|--------|-------|--------------|---------------|---------------|-------|--------------|--------------|---------------|
| <i>Cvu-II</i> |        | -     | -            | <b>-8.93</b>  | <b>-8.33</b>  | -     | -            | -            | -             |
| <i>Mvi-C</i>  | 118360 | -     | -            | <b>22.89</b>  | <b>-6.58</b>  | -     | -            | -            | -             |
| <i>Mvi-I</i>  |        | -     | -            | <b>21.31</b>  | <b>10.39</b>  | -     | -            | -            | -             |
| <i>Mvi-II</i> |        | -     | -            | <b>6.66</b>   | <b>-5.66</b>  | -     | -            | -            | -             |
| <i>Ota-C</i>  | 71666  | -     | -            | <b>5.57</b>   | <b>-0.04</b>  | -     | -            | -            | -             |
| <i>Ota-I</i>  |        | -     | -            | <b>8.81</b>   | <b>0.38</b>   | -     | -            | -            | -             |
| <i>Ota-II</i> |        | -     | -            | <b>-4.4</b>   | <b>-9.2</b>   | -     | -            | -            | -             |
| <i>Pnu-C</i>  | 138829 | -     | -            | 1.09          | <b>-3.04</b>  | -     | -            | -            | -             |
| <i>Pnu-I</i>  |        | -     | -            | <b>18.51</b>  | <b>9.76</b>   | -     | -            | -            | -             |
| <i>Pnu-II</i> |        | -     | -            | <b>-20.43</b> | <b>-12.26</b> | -     | -            | -            | -             |
| <i>Ppa-C</i>  | 122890 | -     | -            | <b>28.73</b>  | <b>-4.36</b>  | -     | -            | -            | -             |
| <i>Ppa-I</i>  |        | -     | -            | <b>18.06</b>  | <b>8.04</b>   | -     | -            | -            | -             |
| <i>Ppa-II</i> |        | -     | -            | <b>2.42</b>   | <b>-14.63</b> | -     | -            | -            | -             |
| <i>Sob-C</i>  | 161452 | -     | -            | 0.6           | <b>-11.12</b> | -     | -            | -            | -             |
| <i>Sob-I</i>  |        | -     | -            | <b>19.26</b>  | <b>8.86</b>   | -     | -            | -            | -             |
| <i>Sob-II</i> |        | -     | -            | <b>-5.61</b>  | <b>-13.62</b> | -     | -            | -            | -             |
| <i>Pth-C</i>  | 119707 | -0.87 | -1.40        | -             | -             | -     | -            | -            | -             |
| <i>Pth-I</i>  |        | 0.64  | <b>14.71</b> | -             | -             | -     | -            | -            | -             |
| <i>Pth-II</i> |        | 1.37  | <b>-8.31</b> | -             | -             | -     | -            | -            | -             |
| <i>Pko-C</i>  | 117190 | -1.15 | -1.80        | -             | -             | -     | -            | -            | -             |
| <i>Pko-I</i>  |        | 0.91  | <b>15.37</b> | -             | -             | -     | -            | -            | -             |
| <i>Pko-II</i> |        | 0.92  | <b>-9.49</b> | -             | -             | -     | -            | -            | -             |
| <i>Mpo-C</i>  | 121024 | -     | -            | -             | -             | -     | -            | <b>24.01</b> | <b>-6.82</b>  |
| <i>Mpo-I</i>  |        | -     | -            | -             | -             | -     | -            | <b>16.76</b> | <b>6.32</b>   |
| <i>Mpo-II</i> |        | -     | -            | -             | -             | -     | -            | <b>-5.61</b> | <b>-10.21</b> |
| <i>Mtr-C</i>  | 124033 | -     | -            | -             | -             | -0.76 | <b>6.37</b>  | -            | -             |
| <i>Mtr-I</i>  |        | -     | -            | -             | -             | 0.66  | <b>10.49</b> | -            | -             |
| <i>Mtr-II</i> |        | -     | -            | -             | -             | -0.03 | <b>4.26</b>  | -            | -             |

Category VII

| <b>Species</b> | <b>Len</b> | <b>A1-A1</b> |
|----------------|------------|--------------|
| <i>Lte-C</i>   | 195081     | <b>4.48</b>  |
| <i>Lte-I</i>   |            | <b>7.28</b>  |
| <i>Lte-II</i>  |            | -0.38        |
| <i>She-C</i>   | 223902     | <b>10.3</b>  |
| <i>She-I</i>   |            | <b>13.77</b> |
| <i>She-II</i>  |            | <b>-4.25</b> |
| <i>Spu-C</i>   | 157089     | <b>-7.29</b> |
| <i>Spu-I</i>   |            | -0.16        |
| <i>Spu-II</i>  |            | 0.2          |
| <i>Zci-C</i>   | 165372     | <b>-6.57</b> |
| <i>Zci-I</i>   |            | <b>-5.91</b> |
| <i>Zci-II</i>  |            | <b>-8.51</b> |
