# Supplementary material for: A comparative approach to elucidate chloroplast genome replication
Source: PubMed Central journal article supplement (PMC2695485; doi:10.1186/1471-2164-10-237), 2009-05-20
Supplement: 1471-2164-10-237-S4.pdf [file 1471-2164-10-237-S4.pdf]

A.

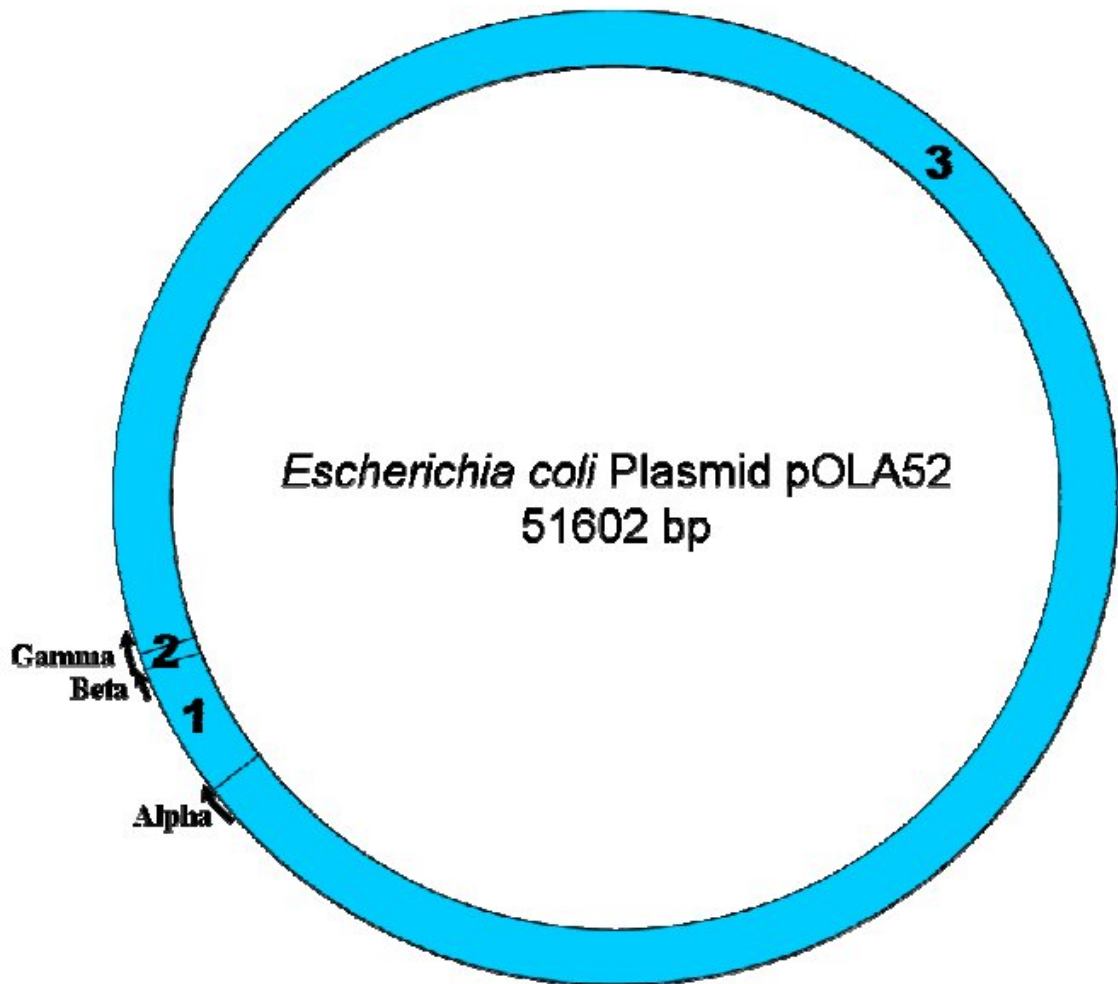

B.

| <b>Species</b>              | <b>R1</b>    | <b>R2</b>   | <b>R3</b>     |
|-----------------------------|--------------|-------------|---------------|
| <i>E. coli</i> Plasmid - C  | -1.47        | 0.27        | <b>15.45</b>  |
| <i>E. coli</i> Plasmid - I  | 1.84         | <b>-2.5</b> | <b>-11.25</b> |
| <i>E. coli Plasmid - II</i> | <b>-3.68</b> | 0.58        | <b>12.32</b>  |
